# Supplementary material for: Metabolite Profiling of the Antisense Oligonucleotide Eluforsen Using Liquid Chromatography-Mass Spectrometry
Source: PubMed Central journal article supplement — Mol Ther Nucleic Acids. 2019 Jul 22;17:714–25. doi: 10.1016/j.omtn.2019.07.006 (PMC6704339; doi:10.1016/j.omtn.2019.07.006), 2019-07-22
Supplement: mmc1.pdf [file mmc1.pdf]

**OMTN, Volume 17**

## **Supplemental Information**

### **Metabolite Profiling of the Antisense**

### **Oligonucleotide Eluforsen Using**

### **Liquid Chromatography-Mass Spectrometry**

**Jaeah Kim, Babak Basiri, Chopie Hassan, Carine Punt, Erik van der Hage, Cathaline den Besten, and Michael G. Bartlett**

| Oligos    | Predicted $m/z$ & charge states |          |          |          |
|-----------|---------------------------------|----------|----------|----------|
|           | -16                             | -15      | -14      | -13      |
| Eluforsen | 715.8197                        | 763.6082 | 818.2237 | 881.2415 |
| 3'n-1     | 694.8036                        | 741.191  | 794.2052 | 855.3755 |
| 3'n-2     | 673.7874                        | 718.7738 | 770.1868 | 829.5095 |

| Oligos    | Predicted $m/z$ & charge states |          |          |          |
|-----------|---------------------------------|----------|----------|----------|
|           | -16                             | -15      | -14      | -13      |
| Eluforsen | 715.8197                        | 763.6082 | 818.2237 | 881.2415 |
| 3'n-1     | 694.8036                        | 741.191  | 794.2052 | 855.3755 |
| 3'n-2     | 673.7874                        | 718.7738 | 770.1868 | 829.5095 |

| Oligos    | Predicted $m/z$ & charge states |          |          |          |
|-----------|---------------------------------|----------|----------|----------|
|           | -16                             | -15      | -14      | -13      |
| Eluforsen | 715.8197                        | 763.6082 | 818.2237 | 881.2415 |
| 3'n-1     | 694.8036                        | 741.191  | 794.2052 | 855.3755 |
| 3'n-2     | 673.7874                        | 718.7738 | 770.1868 | 829.5095 |

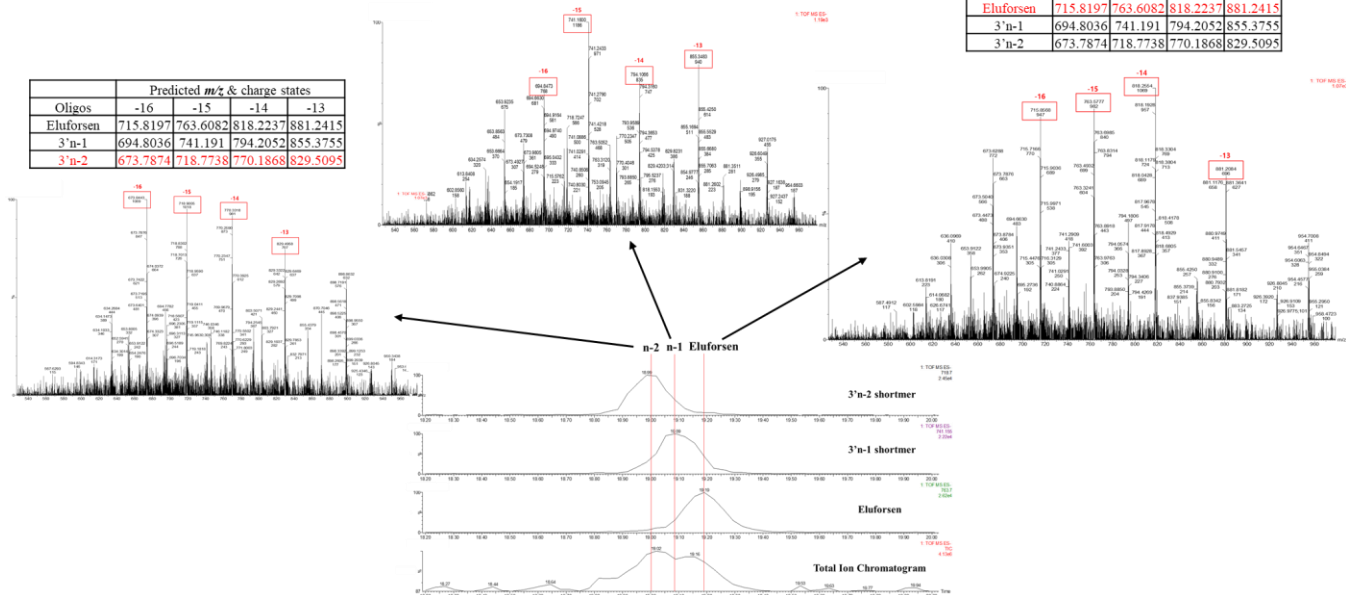

**Supplementary Figure 1** Examples of how to identify eluforsen and its metabolites from precursor ion chromatogram and MS spectra.

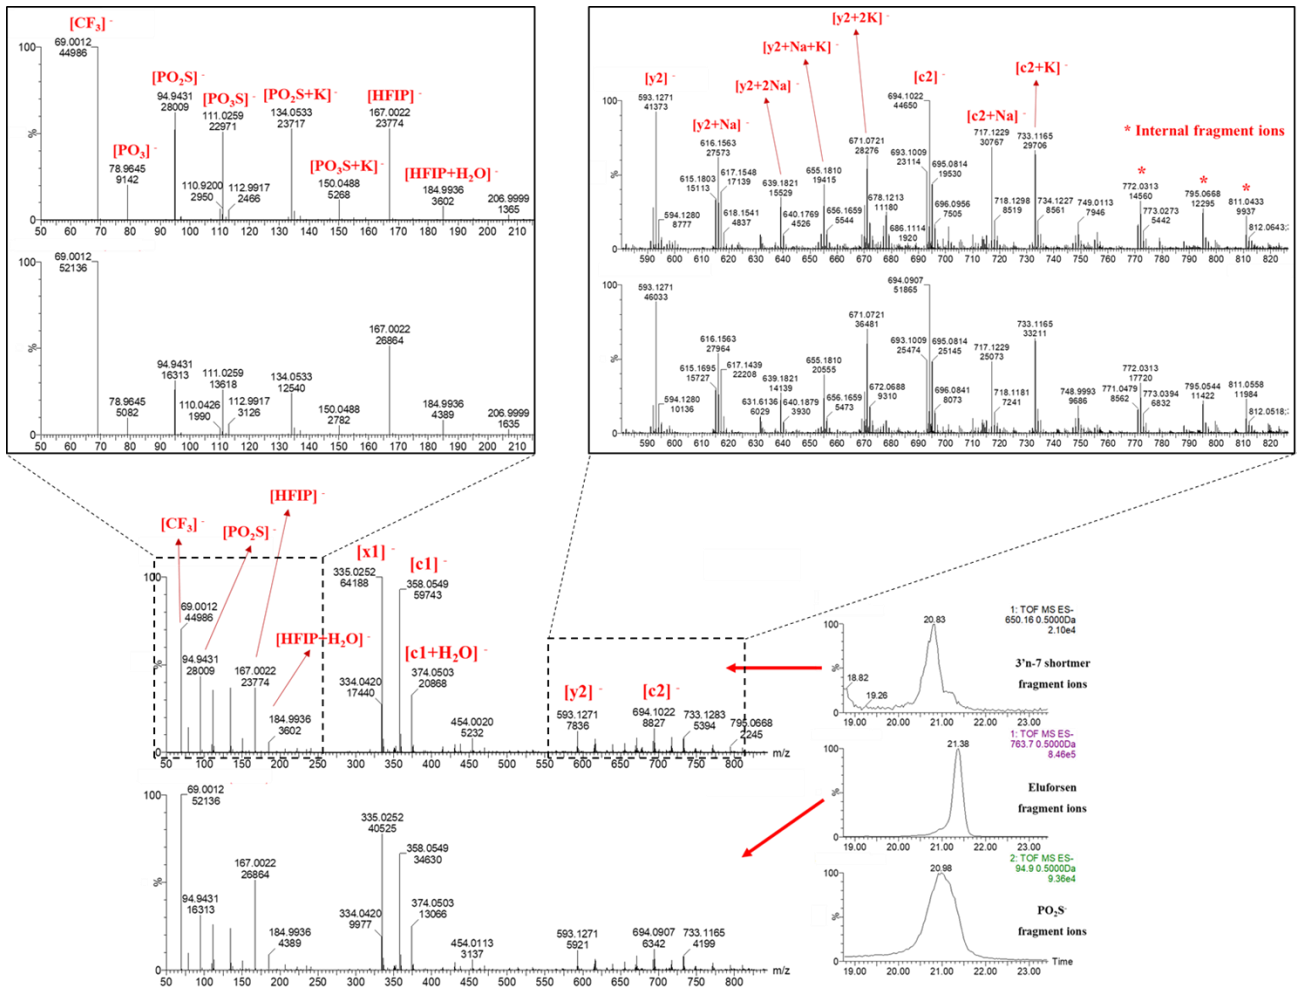

Supplementary Figure 2 Examples of MS<sup>E</sup> fragmentation patterns of eluforsen and its metabolites.

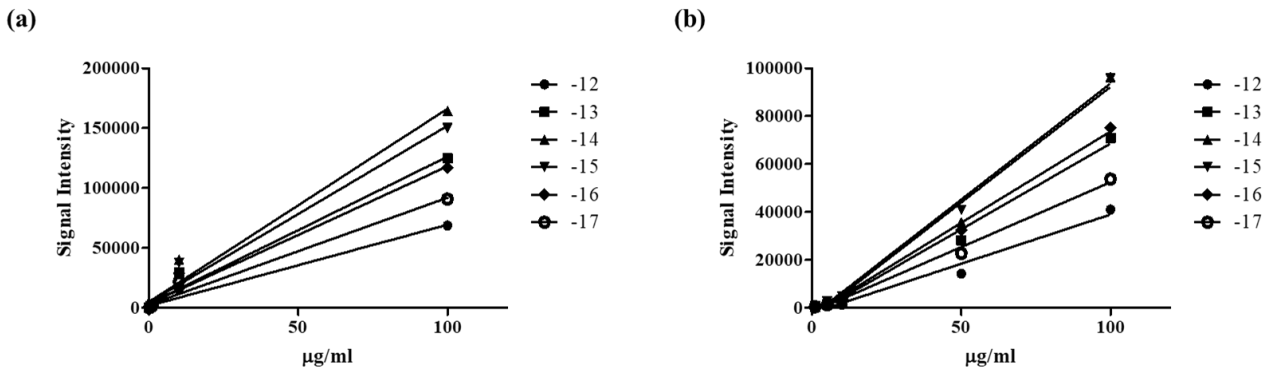

| Charge States                          | -12    | -13    | -14    | -15    | -16    | -17    |
|----------------------------------------|--------|--------|--------|--------|--------|--------|
| R <sup>2</sup> (from 0.1 to 100 µg/ml) | 0.9846 | 0.9807 | 0.9789 | 0.9771 | 0.9790 | 0.9805 |
| R <sup>2</sup> (from 0.1 to 10 µg/ml)  | 0.9997 | 0.9995 | 0.9997 | 0.9994 | 0.9997 | 0.9996 |

| Charge States                        | -12    | -13    | -14    | -15    | -16    | -17    |
|--------------------------------------|--------|--------|--------|--------|--------|--------|
| R <sup>2</sup> (from 1 to 100 µg/ml) | 0.9782 | 0.9902 | 0.9842 | 0.9947 | 0.9950 | 0.9946 |
| R <sup>2</sup> (from 1 to 50 µg/ml)  | 0.9914 | 0.9915 | 0.9922 | 0.9939 | 0.9934 | 0.9968 |

Supplementary Figure 3 Calibration curves for liver (a) and lung (b) samples.

### Three PS oxidations

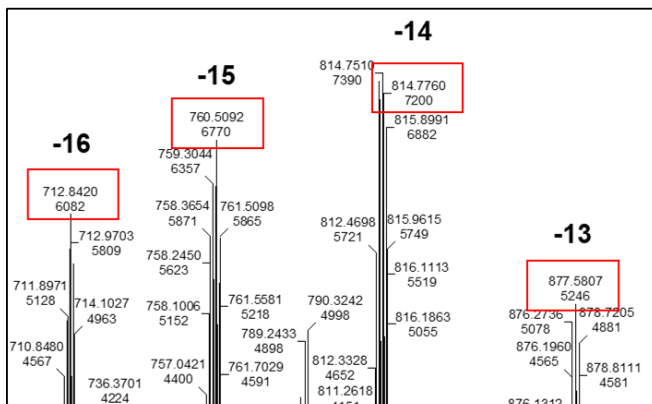

### Four PS oxidations

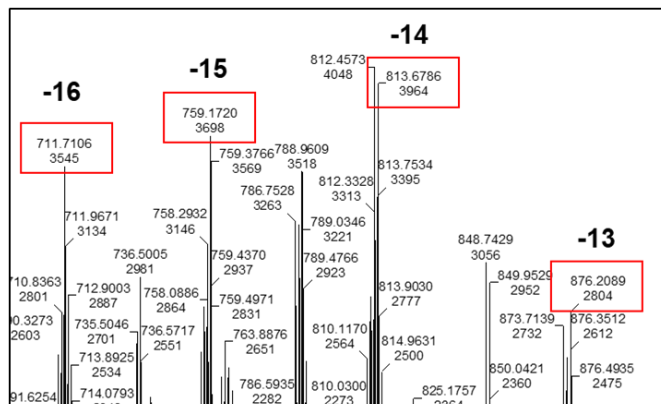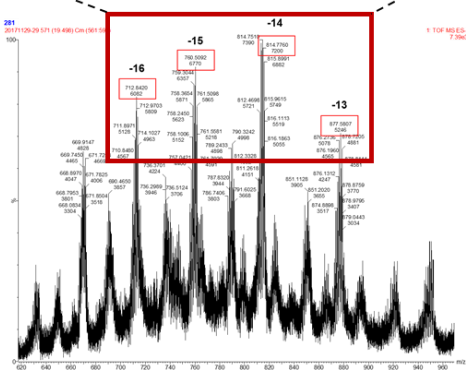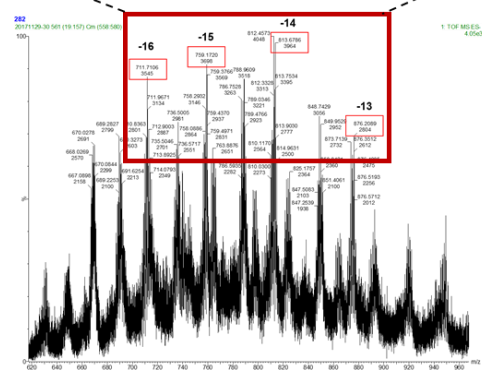

**Supplementary Figure 4 Examples of MS spectra to confirm the presence of some oxidations of phosphorothioate backbone in mouse lung samples.**
